# Supplementary material for: Seasonal Hair Glucocorticoid Fluctuations in Wild Mice (Phyllotis darwini) within a Semi-Arid Landscape in North-Central Chile
Source: MDPI journal article supplement (doi:10.3390/ani14091260), 2024-04-23

**Figure S1.** Parallelism curves for pooled hair extract from *Phyllotis darwini*. Serial dilutions of pooled hair extract are shown in red, and standard curve is shown in black with each concentration indicated with a diamond.

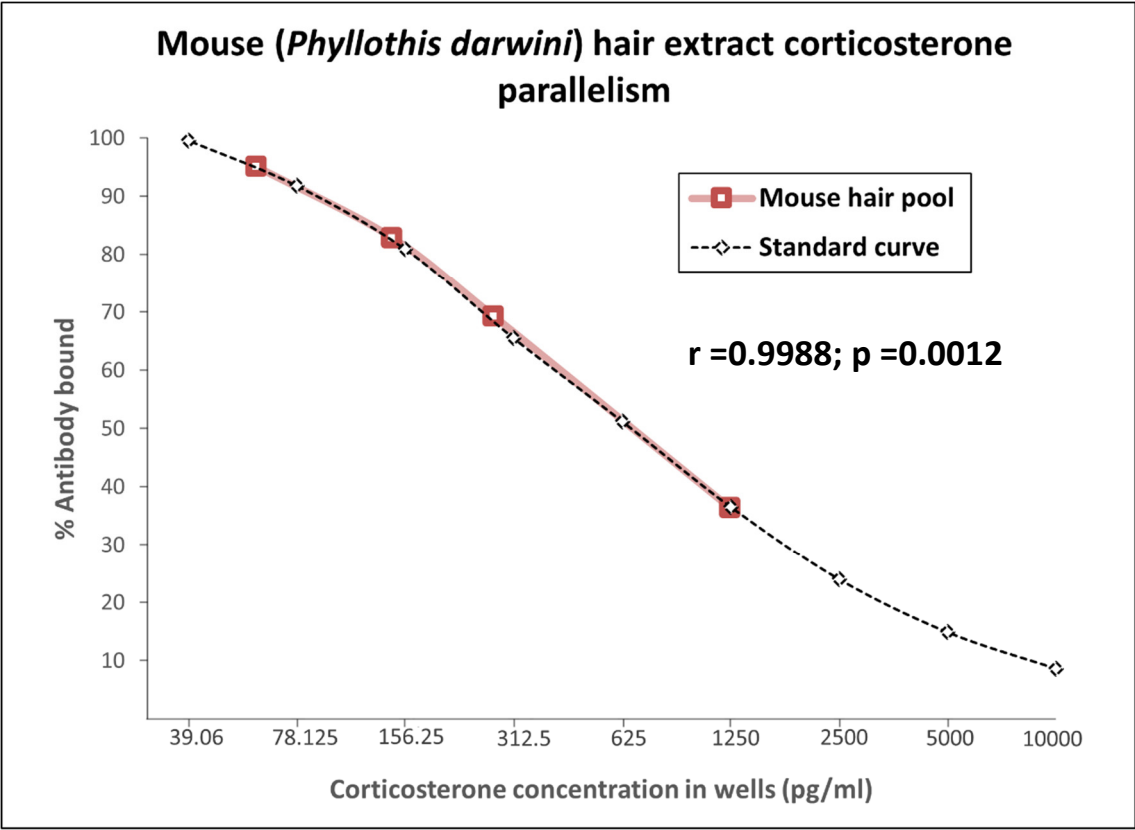

Supplement: s1 [file s1]
